# Supplementary material
Source: ML conference proceedings conference paper supplement (https://openreview.net/forum?id=heYWeCpOlS)
Supplement: supplementary_material [file Reproducibility Statement.pdf › supplementary/Reproducibility Statement.pdf]

## 548 **C Reproducibility Statement**

549 In this work, we used ChatGPT to generate the entire research narrative, while human authors  
550 conducted the experiments and validated the results. We provide the full conversation with ChatGPT,  
551 documenting our prompts and the model’s step-by-step generation process, at [https://chatgpt.](https://chatgpt.com/share/68d20b8a-baf8-800f-9669-233c06c3fb44)  
552 [com/share/68d20b8a-baf8-800f-9669-233c06c3fb44](https://chatgpt.com/share/68d20b8a-baf8-800f-9669-233c06c3fb44).
